# Supplementary material for: Herpes Simplex Virus Type 1 Clinical Isolates Respond to UL29-Targeted siRNA Swarm Treatment Independent of Their Acyclovir Sensitivity
Source: MDPI journal article supplement (doi:10.3390/v12121434), 2020-12-13
Supplement: s1 [file s1]

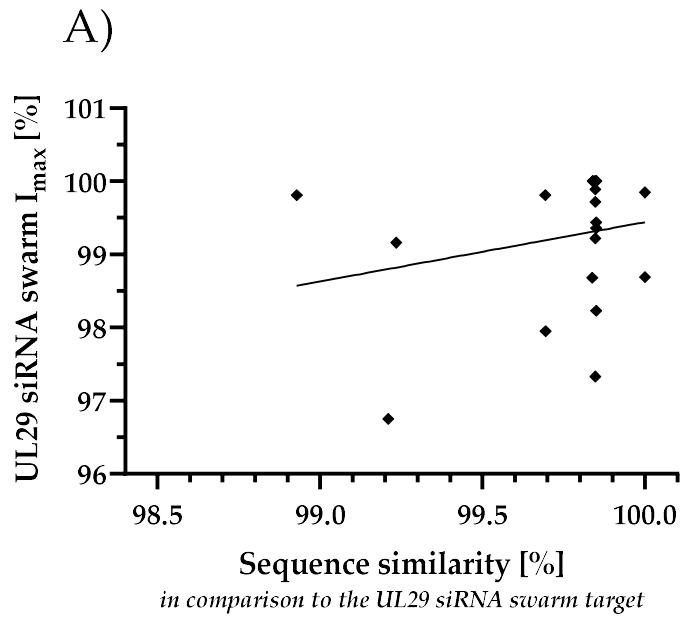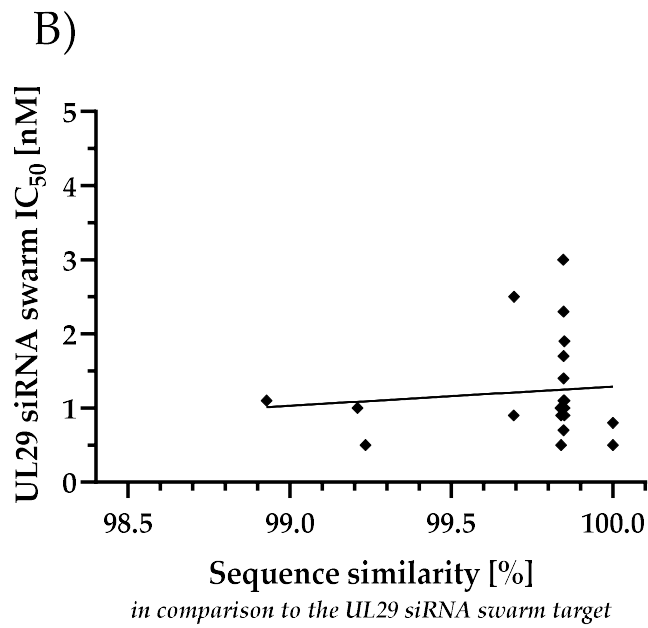

Supplementary Figure S3 – UL29 siRNA swarm potency or efficacy do not correlate with RNAi target sequence similarities. **(A)** Correlation between the UL29 siRNA target sequence similarity and maximal inhibitory efficacy ( $I_{\max}$ ) of UL29 siRNA swarm against the HSV-1 strains. The Spearman's correlation coefficient value ( $r$ ) for the data set is -0.1566. The correlation was non-significant ( $p=0.4979$ ). **(B)** Correlation between the UL29 siRNA target sequence similarity and sensitivity to UL29 siRNA swarm. The Spearman's correlation coefficient value for the data set is 0.09715 and the correlation was non-significant ( $p=0.6753$ ).
