# Supplementary material for: Herpes Simplex Virus Type 1 Clinical Isolates Respond to UL29-Targeted siRNA Swarm Treatment Independent of Their Acyclovir Sensitivity
Source: MDPI journal article supplement (doi:10.3390/v12121434), 2020-12-13
Supplement: s1 [file s1]

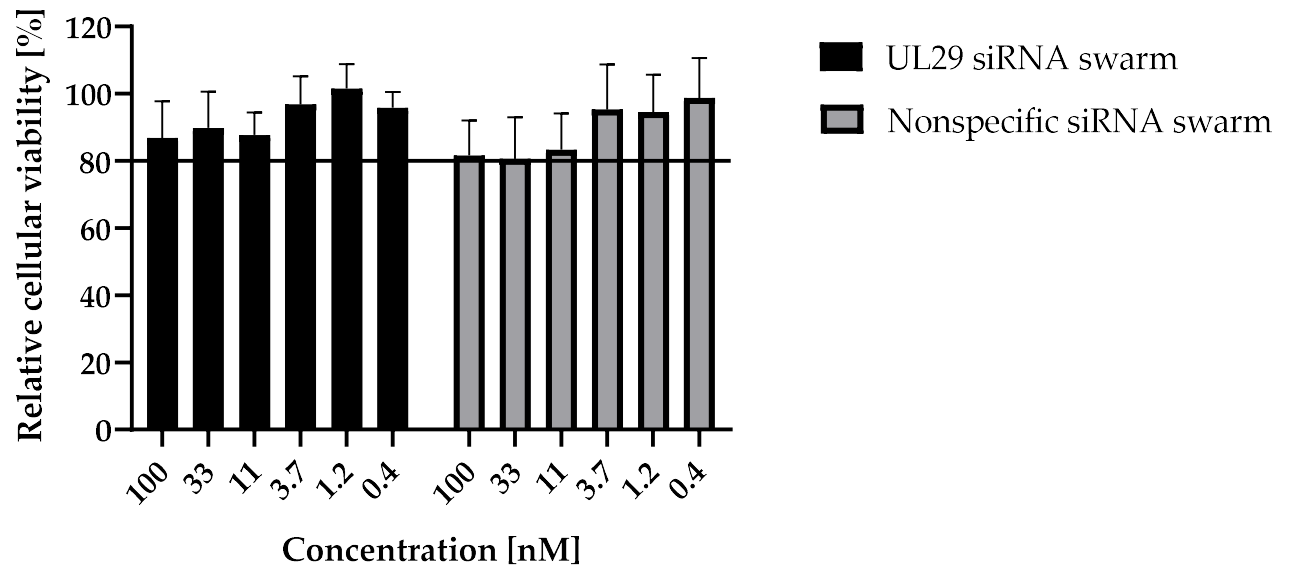

**Supplementary Figure S1 – Viability of Vero cells after UL29 siRNA swarm treatment.** Vero cells were transfected with either UL29 siRNA swarm or nonspecific siRNA swarm with 0.4 to 100 nM. Two days post infection, the cellular viability was determined using a luminescent cell viability assay, CellTiter Glo (G7570, Promega, Madison, WI). The derived viability data is shown as relative viability % versus water transfection. The vertical line represents 80% relative viability, which is considered good tolerability. The nonspecific, bacterial *lacI* gene- derived siRNA swarm is previously described in Levanova et al. (2020), ref. [15].
